# Supplementary material for: Low-Dose Niacin Supplementation Improves Motor Function in US Veterans with Parkinson’s Disease: A Single-Center, Randomized, Placebo-Controlled Trial
Source: MDPI journal article supplement (doi:10.3390/biomedicines9121881), 2021-12-10
Supplement: s1 [file s1]

**Supplementary Table S1:** Mean values for clinical variables measured for the two treatment groups at the baseline

| Variable, units              | Baseline Values, Mean (SD) |                     |
|------------------------------|----------------------------|---------------------|
|                              | Placebo Group              | Niacin Group        |
| UPDRS III Scores             | 22.4 $\pm$ 11.8            | 21.3 $\pm$ 15.8     |
| Rigidity                     | 1.69 $\pm$ 2.23            | 1.5 $\pm$ 1.92      |
| Resting Tremor               | 4.52 $\pm$ 2.87            | 3.11 $\pm$ 2.82     |
| Bradykinesia                 | 4.5 $\pm$ 4.6              | 4 $\pm$ 4.5         |
| Cognitive flexibility        | 73.38 $\pm$ 57.11          | 79.42 $\pm$ 62.46   |
| Grip Strength, PSI           |                            |                     |
| First affected hand          | 305.09 $\pm$ 105.26        | 297.04 $\pm$ 125.68 |
| Non (or later) affected hand | 300.43 $\pm$ 80.49         | 284.1 $\pm$ 123.09  |
| FSS                          | 36.65 $\pm$ 13.02          | 40.28 $\pm$ 11.99   |
| VAFS                         | 5.4 $\pm$ 2.23             | 5.17 $\pm$ 2.23     |
| REM sleep, %                 | 15.19 $\pm$ 12.1           | 22.5 $\pm$ 13.36    |
| GDS                          | 6.2 $\pm$ 5.87             | 7.89 $\pm$ 7.31     |
| Stroop 3 trial               | 8.13 $\pm$ 6.64            | 6.18 $\pm$ 7.92     |
| Walk and Turn, s             | 11.47 $\pm$ 3.46           | 10.33 $\pm$ 3.16    |
| Valine, mg/dL                | 229.33 $\pm$ 51.78         | 245.64 $\pm$ 33.42  |
| Tyrosine, mg/dL              | 73.93 $\pm$ 14.77          | 64.93 $\pm$ 16.28   |
| Tryptophan, mg/dL            | 60.87 $\pm$ 11.39          | 53.5 $\pm$ 10.81    |
| Serotonin, mg/dL             | 89.56 $\pm$ 60.5           | 84.21 $\pm$ 68.17   |
| Phenylalanine, mg/dL         | 74.47 $\pm$ 12.59          | 73.07 $\pm$ 9.74    |
| Leucine, mg/dL               | 136.87 $\pm$ 38.75         | 143.07 $\pm$ 27.71  |
| Isoleucine, mg/dL            | 72.14 $\pm$ 24.2           | 73.36 $\pm$ 15      |

**Supplementary Table S2:** Comparative differences in motor and cognitive scores during randomized period (baseline vs 6months), open label trial (6 vs 12months) and baseline to study end (baseline vs 12 months) .

| Clinical Variable, units     | baseline vs 6-month change (Randomized, placebo-controlled trial) |                      | 6 vs 12 month change (open-label niacin treatment) |                       | baseline vs 12- month change |                       |
|------------------------------|-------------------------------------------------------------------|----------------------|----------------------------------------------------|-----------------------|------------------------------|-----------------------|
|                              | Placebo Group Change                                              | Niacin Group Change  | Placebo Group Change                               | Niacin Group Change   | Placebo Group Change         | Niacin Group Change   |
| UPDRS III Scores             | -0.05 (-2.4-2.32)                                                 | -1.06 (-3.68-1.57)   | 4.58 (0.85-8.30)*                                  | 4.63 (1.42-7.83)*     | 4.52 (-0.16-9.21)            | 3.57 (-1.019-8.16)    |
| Rigidity                     | 0.14 (-0.14-0.42)                                                 | 0.03 (-0.26-0.31)    | 0.75 (-0.01-1.51)*                                 | 0.008 (-0.47-0.49)    | 0.90 (-0.05-1.84)            | 0.04 (-0.43-0.5)      |
| Resting Tremor               | 0.05 (-0.54-0.64)                                                 | -0.17 (-0.49-0.16)   | 0.92 (-0.12-1.96)                                  | 0.1 (-0.56-0.76)      | 0.97 (-0.16-2.09)            | -0.07 (-0.94-0.81)    |
| Bradykinesia                 | 0.07 (-0.35-0.49)                                                 | -0.39 (-1.42-0.65)   | 1.13 (0.25-2.02)*                                  | 1.21 (0.36-2.06)*     | 1.21 (0.19-2.23)*            | 0.82 (-0.004-1.65)*   |
| Cognitive flexibility        | -3.04 (-28.04-21.96)                                              | 5.44 (-30.78-41.67)  | -15.18 (-40.6-10.24)                               | 4.9 (-27.8-37.6)      | 18.22 (-42.79-6.35)          | 10.35 (-17.7-38.39)   |
| Grip Strength, PSI           |                                                                   |                      |                                                    |                       |                              |                       |
| First affected hand          | 5.88 (-14.19-25.94)                                               | -22.56 (-53.54-8.43) | -23.58 (-79.14-31.98)                              | -80.3 (-176.2-15.65)  | -17.71 (-62.17-26.75)        | -102.9 (-218.8-13.14) |
| Non (or later) affected hand | 3.73 (-35.11-42.56)                                               | -31.67 (-63.74-0.39) | -11.84 (-56.59-32.92)                              | -54.72 (-128.8-19.38) | -8.12 (-56.34-40.13)         | -86.4 (-187.8-15.05)  |
| FSS                          | -0.06 (-2.5-2.37)                                                 | 1.78 (-5.5-9.05)     | 2.89 (-1.62-7.4)                                   | 4.36 (1.59-7.13)*     | 2.83 (-2.15-7.81)            | 6.14 (-1.59-13.86)    |
| VAFS                         | -0.22 (-0.97-0.53)                                                | -0.44 (-1.74-0.85)   | -0.76 (-1.75-0.24)                                 | -0.39 (-0.92-0.14)    | -0.98 (-2.2-0.25)            | -0.83 (-2.16-0.49)    |
| REM sleep, %                 | -6.26 (-11.05-1.47)*                                              | 1.39 (-5.42-8.2)     | 1.92 (-7.2-11.03)                                  | -4.32 (-10.32-1.68)   | -4.34 (-11.45-2.76)          | -2.93 (-11.11-5.26)   |
| GDS                          | 0.25 (-0.53-1.03)                                                 | 1.17 (-1.75-4.08)    | 1.08 (-1.12-3.28)                                  | 1.37 (-0.5-3.23)      | 1.33 (-1.01-3.66)            | 2.53 (-1.56-6.62)     |
| Stroop 3 trial               | -0.59 (-3.17-1.99)                                                | -2.19 (-5.93-1.54)   | -0.78 (-5.47-3.91)                                 | -0.78 (-2.85-1.28)    | -1.37 (-5.41-2.67)           | -2.98 (-7.73-1.78)    |
| Walk and Turn, s             | 0.44 (-1.08-1.96)                                                 | 0.18 (-0.61-0.96)    | 0.75 (-0.53-2.02)                                  | 1.72 (0.59-2.84)*     | 1.19 (-0.38-2.76)            | 1.89 (0.55-3.23)*     |
| Valine, mg/dL                | 1.83 (-27.05-30.72)                                               | -0.71 (-35.17-33.74) | 4.29 (-32.51-41.08)                                | 21.07 (-16.01-58.15)  | 6.12 (-29.16-41.4)           | 20.36 (-17.62-58.33)  |
| Tyrosine, mg/dL              | 8.82 (-2.2-19.84)                                                 | -0.5 (-10.82-9.82)   | 1.83 (-11.66-15.31)                                | 4.57 (-5.33-14.47)    | 10.65 (1.19-20.1)*           | 4.07 (-8.28-16.42)    |
| Tryptophan, mg/dL            | 7.48 (-0.39-15.34)                                                | -0.07 (-6.1-5.96)    | -4.11 (-12.97-4.75)                                | 4.29 (-4.75-13.32)    | 3.37 (-5.21-11.94)           | 4.21 (-3.69-12.12)    |
| Serotonin, mg/dL             | 25.34 (5.79-44.89)*                                               | 1.21 (-17.82-20.25)  | -18.11 (-37.97-1.75)                               | -13.36 (-58.77-32.06) | 7.23 (-24.06-38.51)          | -12.14 (-49.59-25.31) |
| Phenylalanine, mg/dL         | 3.74 (-8.48-15.97)                                                | -1.64 (-8.62-5.33)   | -0.85 (-12-10.3)                                   | 2.43 (-9.35-14.21)    | 2.9 (-6.82-12.61)            | 0.79 (-10.03-11.6)    |
| Leucine, mg/dL               | 9.26 (-15.26-33.77)                                               | -4.64 (-28.45-19.16) | -1.75 (-29.99-26.5)                                | 14.86 (-9.31-39.02)   | 7.51 (-18.63-33.65)          | 10.21 (-21.1-41.53)   |
| Isoleucine, mg/dL            | 4.03 (-14.21-22.26)                                               | -4.79 (-19.34-9.77)  | 1.26 (-14.45-16.97)                                | 8.64 (-4.48-21.77)    | 5.29 (-8.82-19.39)           | 3.86 (-10.4-18.12)    |

Six-months to 12-month time all the participants were given 250mg niacin once a day. All the study personnel and patients were blinded to the group assignment. Treatment group assignment code was disclosed at the completion of the study in April 2020. Values presented are Mean (95% CI). \*p<0.05
